# Supplementary material
Source: PubMed Central journal article supplement (PMC3397839)
Supplement: supp_M112.343608_Supplementary.pdf [file supp_M112.343608_Supplementary.pdf]

## Supplemental Fig 1

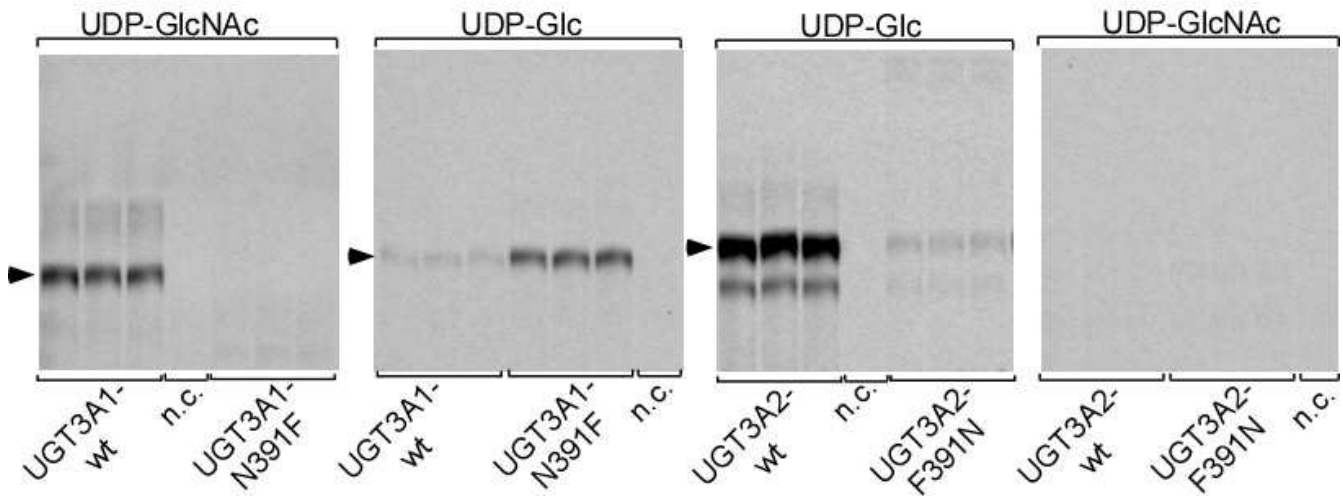

**Supplementary Figure 1.** Catalytic activity of human UGT3A1 and UGT3A2 variants stably expressed in HEK293 cells. Triplicate assays were chromatographed and visualized by autoradiography. Assay and exposure conditions vary between panels but were optimized to detect the presence of the conjugation products. The arrows indicate genistein-Glc and genistein-GlcNAc conjugates. n.c. – negative control HEK293 lysate.
